# Supplementary material
Source: Springer Nature journal article supplement (https://www.springermedizin.de/resource/supplementary/13075_2011_3148_MOESM3_ESM.pdf/9693848)

**RA (n=17)**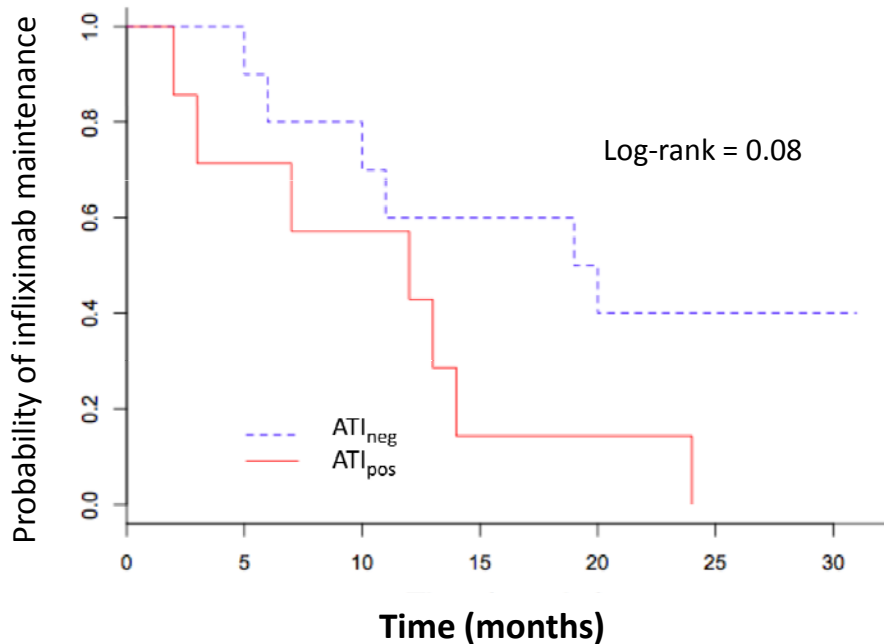**SpA (n=91)**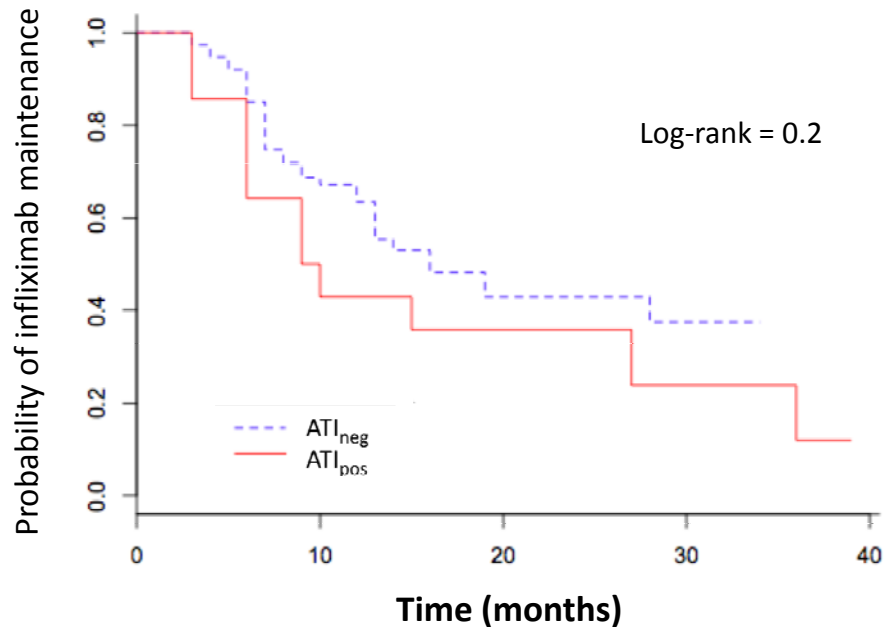

Supplement: MOESM3 [file 9693848]
